# Supplementary material
Source: PubMed Central journal article supplement (PMC10643730)
Supplement: 11357_2023_849_MOESM1_ESM.pdf [file 11357_2023_849_MOESM1_ESM.pdf]

Supplementary Figure. 1

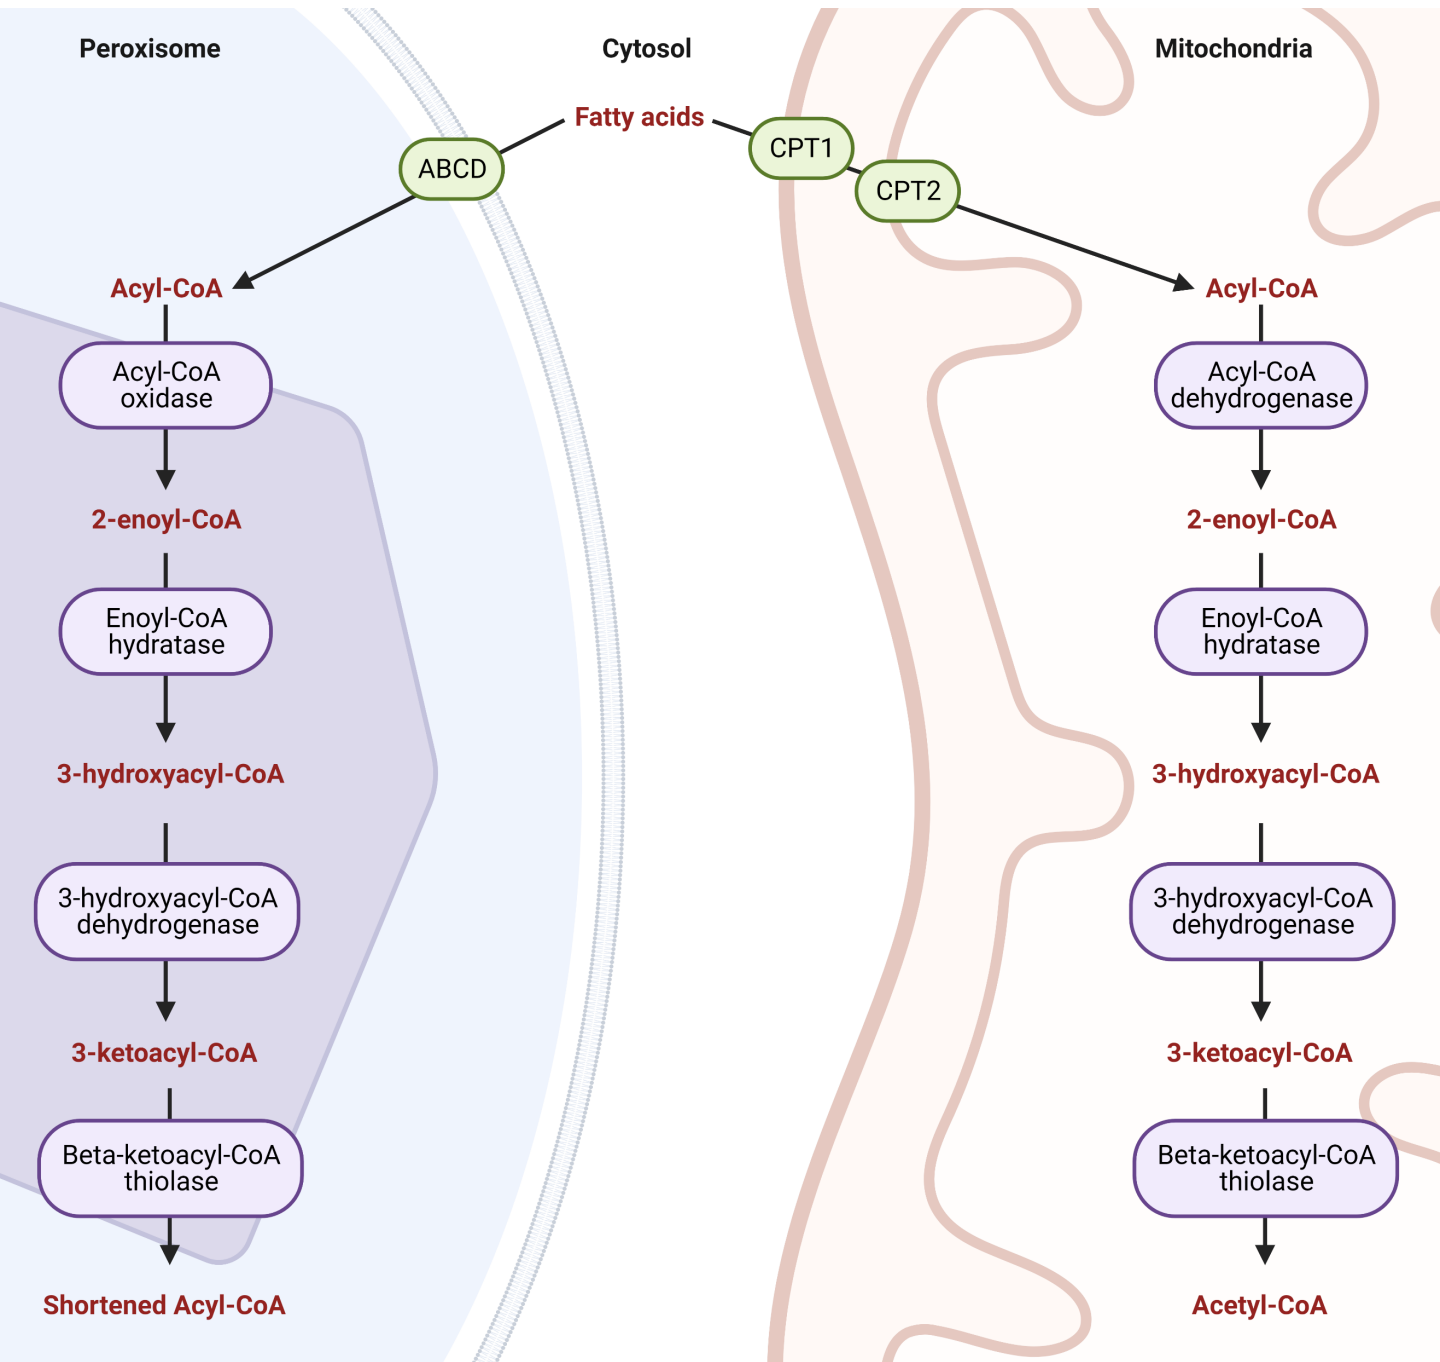

# Supplementary Figure. 2

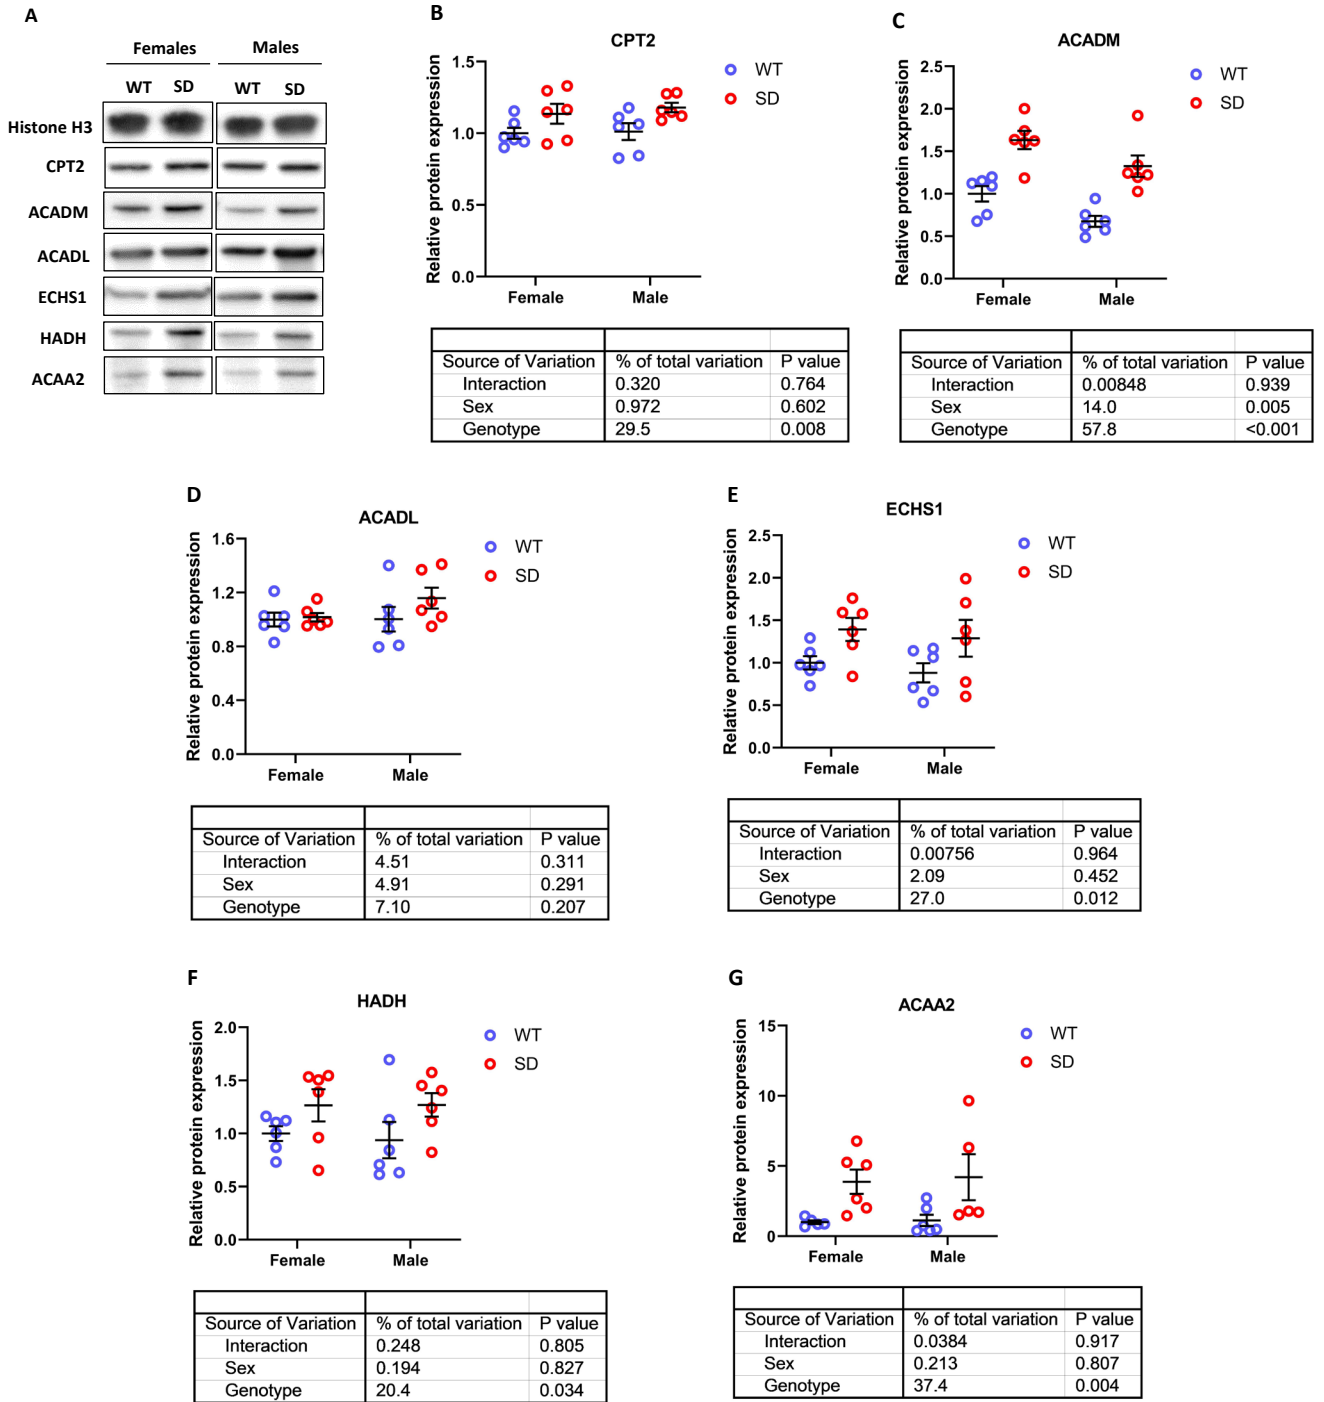

### Supplementary Figure. 3

**A**

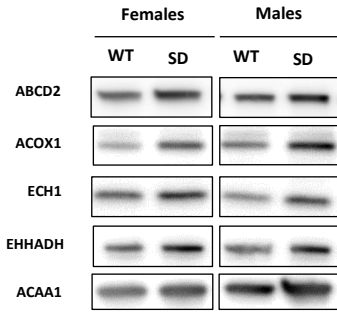

**B**

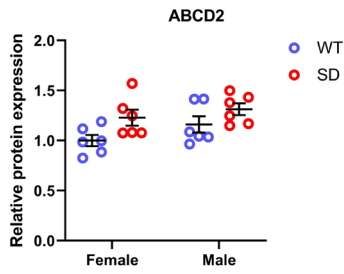

| Source of Variation | % of total variation | P value |
|---------------------|----------------------|---------|
| Interaction         | 0.973                | 0.591   |
| Sex                 | 9.86                 | 0.097   |
| Genotype            | 24.0                 | 0.013   |

**C**

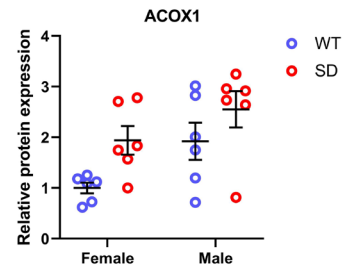

| Source of Variation | % of total variation | P value |
|---------------------|----------------------|---------|
| Interaction         | 0.793                | 0.609   |
| Sex                 | 19.6                 | 0.018   |
| Genotype            | 20.7                 | 0.015   |

**D**

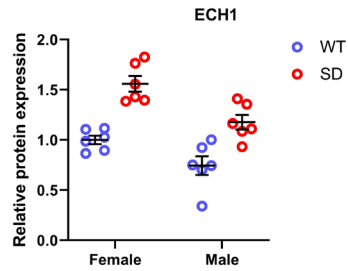

| Source of Variation | % of total variation | P value |
|---------------------|----------------------|---------|
| Interaction         | 0.871                | 0.404   |
| Sex                 | 22.0                 | <0.001  |
| Genotype            | 53.2                 | <0.001  |

**E**

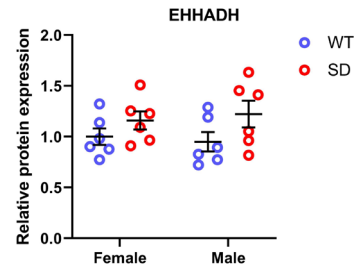

| Source of Variation | % of total variation | P value |
|---------------------|----------------------|---------|
| Interaction         | 1.24                 | 0.585   |
| Sex                 | 0.0139               | 0.954   |
| Genotype            | 18.3                 | 0.046   |

**F**

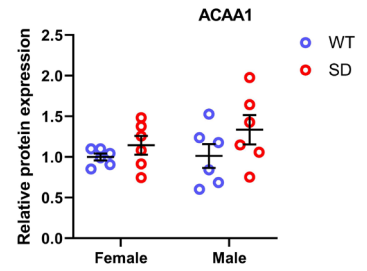

| Source of Variation | % of total variation | P value |
|---------------------|----------------------|---------|
| Interaction         | 1.92                 | 0.503   |
| Sex                 | 2.51                 | 0.445   |
| Genotype            | 13.1                 | 0.090   |

# Supplementary Figure. 4

A

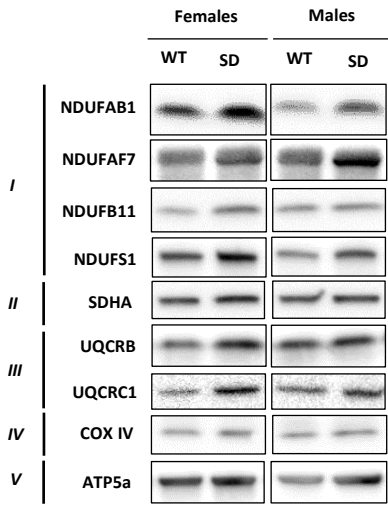

B

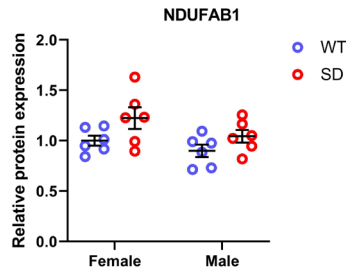

| Source of Variation | % of total variation | P value |
|---------------------|----------------------|---------|
| Interaction         | 0.938                | 0.601   |
| Sex                 | 12.1                 | 0.071   |
| Genotype            | 20.7                 | 0.021   |

C

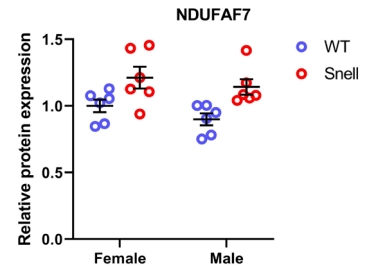

| Source of Variation | % of total variation | P value |
|---------------------|----------------------|---------|
| Interaction         | 0.181                | 0.800   |
| Sex                 | 5.53                 | 0.170   |
| Genotype            | 39.7                 | 0.001   |

D

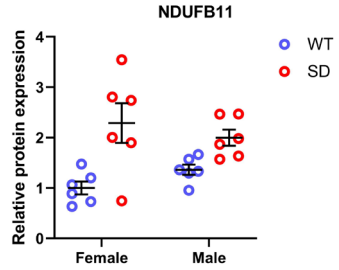

| Source of Variation | % of total variation | P value |
|---------------------|----------------------|---------|
| Interaction         | 5.17                 | 0.166   |
| Sex                 | 0.0614               | 0.877   |
| Genotype            | 44.7                 | <0.001  |

E

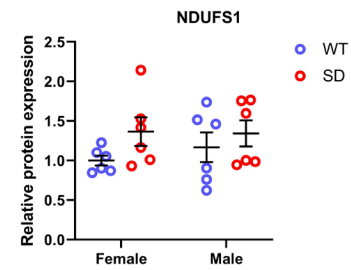

| Source of Variation | % of total variation | P value |
|---------------------|----------------------|---------|
| Interaction         | 1.56                 | 0.552   |
| Sex                 | 0.897                | 0.651   |
| Genotype            | 12.5                 | 0.101   |

F

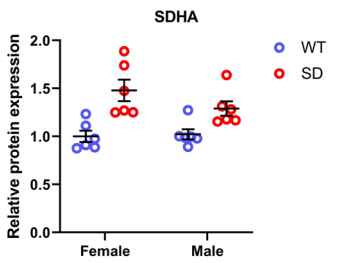

| Source of Variation | % of total variation | P value |
|---------------------|----------------------|---------|
| Interaction         | 3.97                 | 0.193   |
| Sex                 | 2.50                 | 0.298   |
| Genotype            | 49.7                 | <0.001  |

G

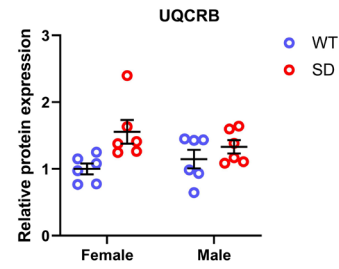

| Source of Variation | % of total variation | P value |
|---------------------|----------------------|---------|
| Interaction         | 6.75                 | 0.169   |
| Sex                 | 0.291                | 0.770   |
| Genotype            | 26.7                 | 0.010   |

H

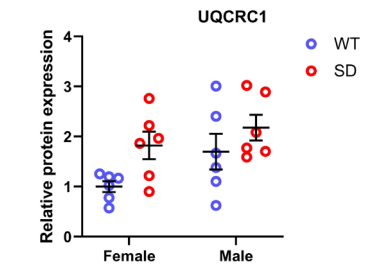

| Source of Variation | % of total variation | P value |
|---------------------|----------------------|---------|
| Interaction         | 1.38                 | 0.525   |
| Sex                 | 13.0                 | 0.060   |
| Genotype            | 19.9                 | 0.023   |

I

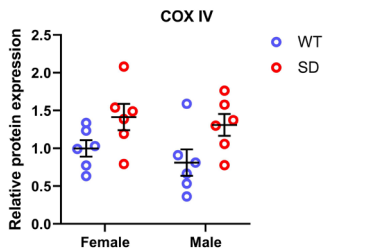

| Source of Variation | % of total variation | P value |
|---------------------|----------------------|---------|
| Interaction         | 0.247                | 0.789   |
| Sex                 | 3.07                 | 0.350   |
| Genotype            | 29.8                 | 0.007   |

J

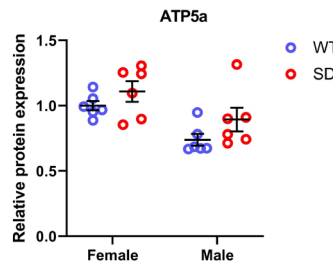

| Source of Variation | % of total variation | P value |
|---------------------|----------------------|---------|
| Interaction         | 0.326                | 0.733   |
| Sex                 | 34.6                 | 0.002   |
| Genotype            | 10.7                 | 0.062   |

## Supplementary Figure. 5

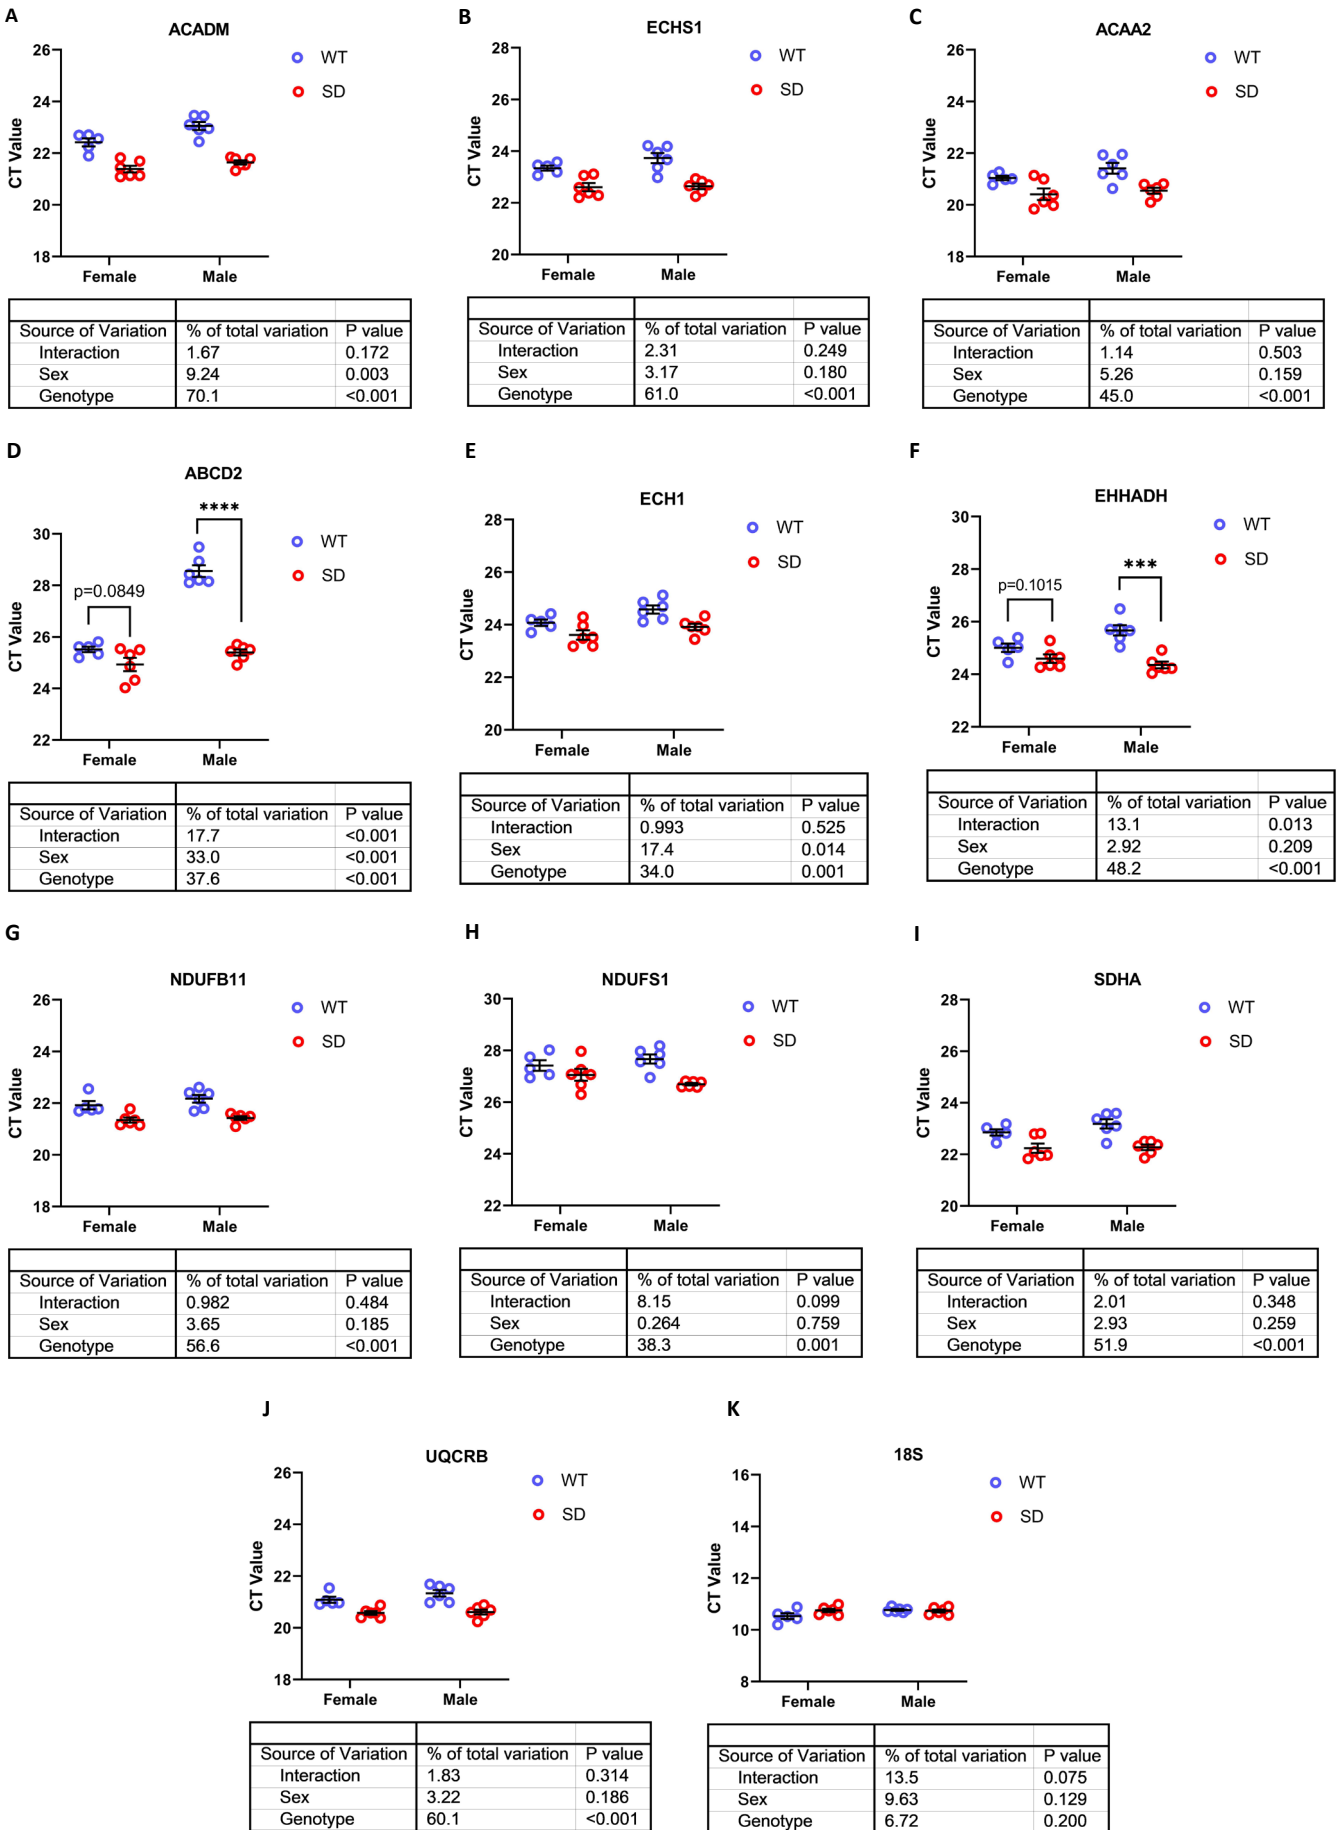

# Supplementary Figure. 6

**A**

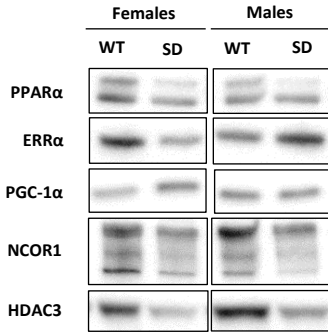

**B**

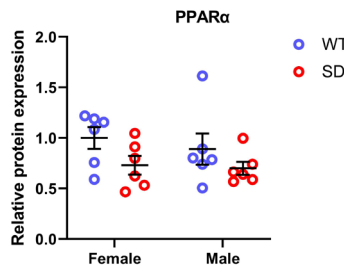

| Source of Variation | % of total variation | P value |
|---------------------|----------------------|---------|
| Interaction         | 0.535                | 0.719   |
| Sex                 | 1.63                 | 0.531   |
| Genotype            | 17.7                 | 0.048   |

**C**

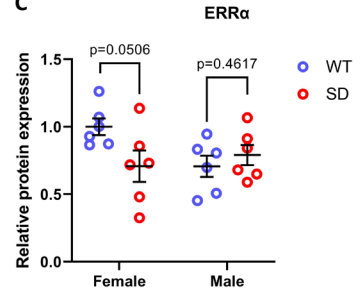

| Source of Variation | % of total variation | P value |
|---------------------|----------------------|---------|
| Interaction         | 17.4                 | 0.040   |
| Sex                 | 5.51                 | 0.230   |
| Genotype            | 5.39                 | 0.235   |

**D**

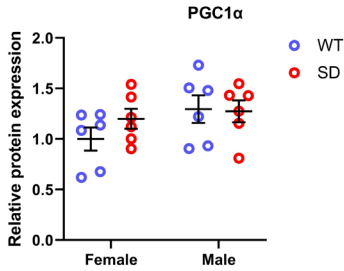

| Source of Variation | % of total variation | P value |
|---------------------|----------------------|---------|
| Interaction         | 3.82                 | 0.349   |
| Sex                 | 10.7                 | 0.123   |
| Genotype            | 2.49                 | 0.448   |

**E**

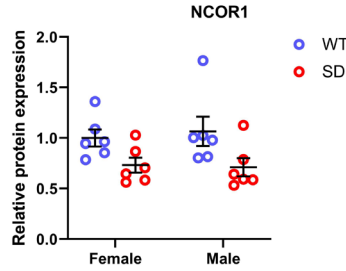

| Source of Variation | % of total variation | P value |
|---------------------|----------------------|---------|
| Interaction         | 0.613                | 0.675   |
| Sex                 | 0.167                | 0.826   |
| Genotype            | 31.5                 | 0.006   |

**F**

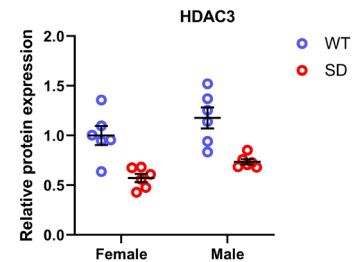

| Source of Variation | % of total variation | P value |
|---------------------|----------------------|---------|
| Interaction         | 0.0145               | 0.928   |
| Sex                 | 8.71                 | 0.036   |
| Genotype            | 56.9                 | <0.001  |
